# Supplementary material for: Electronic Structure and Optical Properties of N/Si-Codoped Anatase TiO2Evaluated Using First Principles Calculations
Source: Hindawi journal article supplement (doi:10.1155/2014/342132), 2014-01-01
Supplement: f1 [file 342132.f1.pdf]

## Supplementary Information

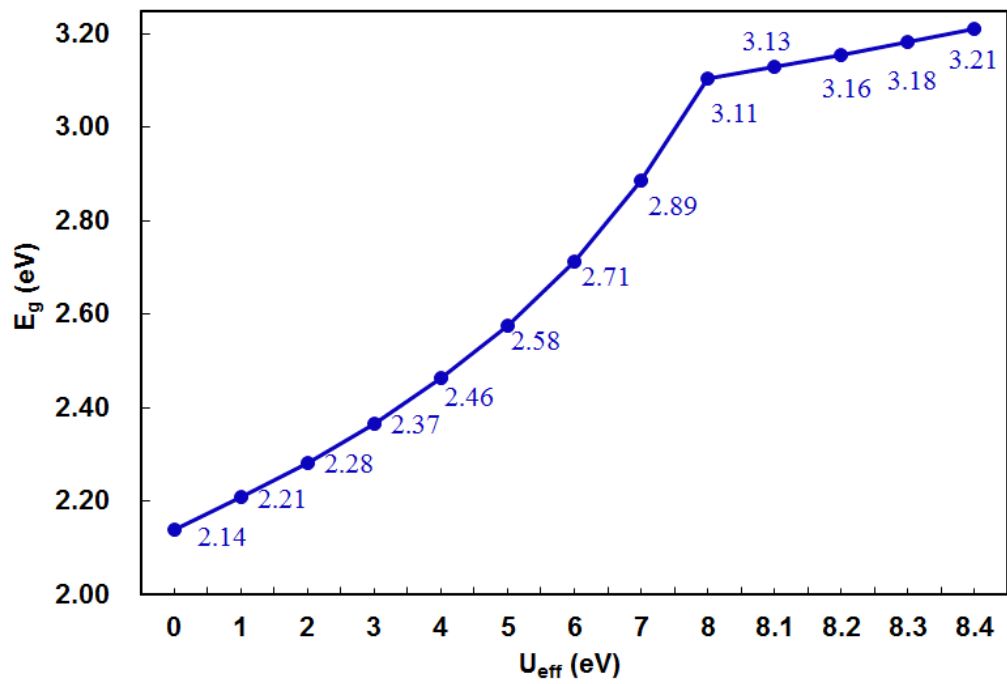

**Figure S1:** Relationship between the effective Hubbard parameter ( $U_{\text{eff}}$ ) and the band gap ( $E_g$ ) of anatase  $\text{TiO}_2$ .
